# Supplementary material for: Improvement of n-Butene Yield in Dimethyl Ether-to-Olefin Reaction Using Ferrierite Zeolite Catalysts
Source: MDPI journal article supplement (doi:10.3390/catal13071040), 2023-06-26
Supplement: s1 [file s1]

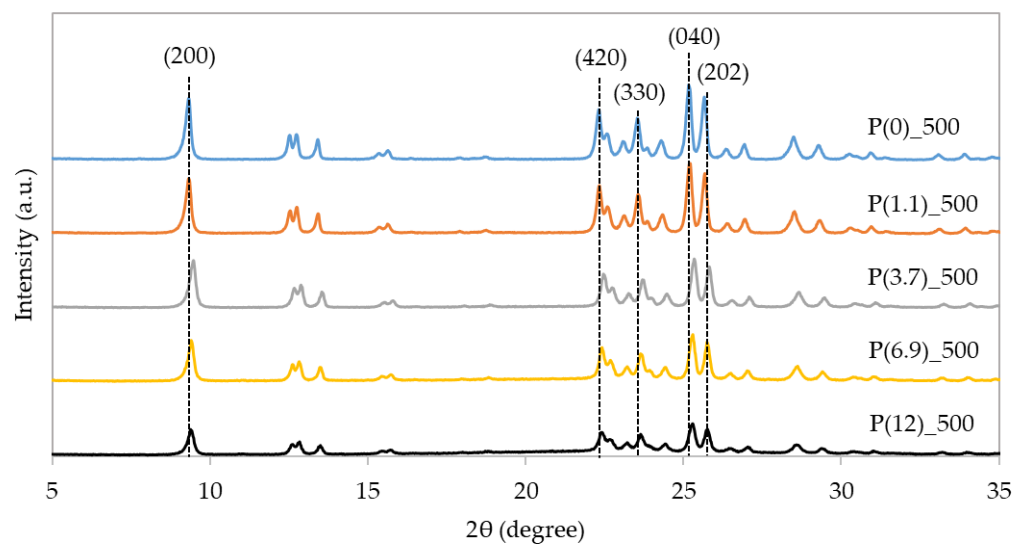

**Figure S1.** XRD patterns of P-modified ferrierite zeolites calcined at 500 °C.

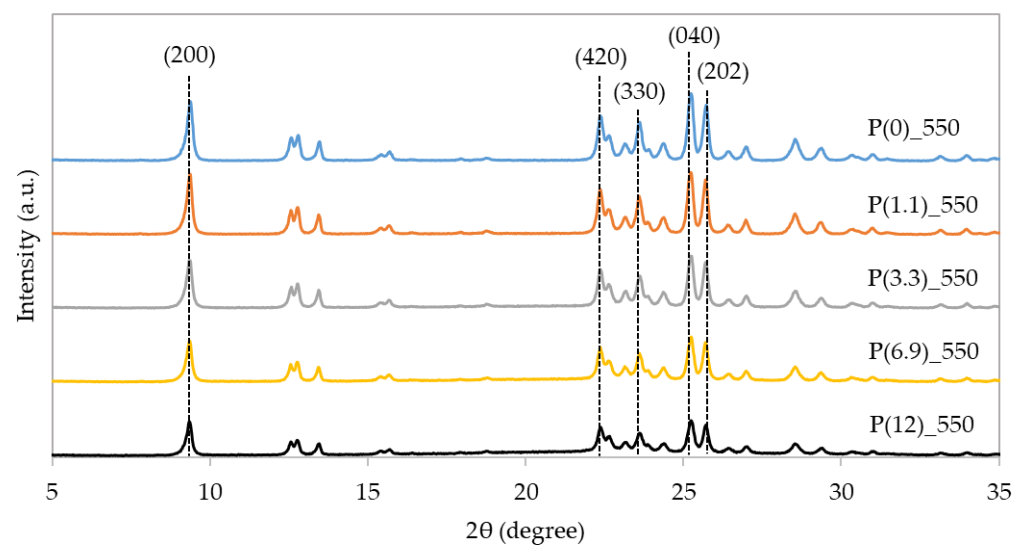

**Figure S2.** XRD patterns of P-modified ferrierite zeolites calcined at 550 °C.

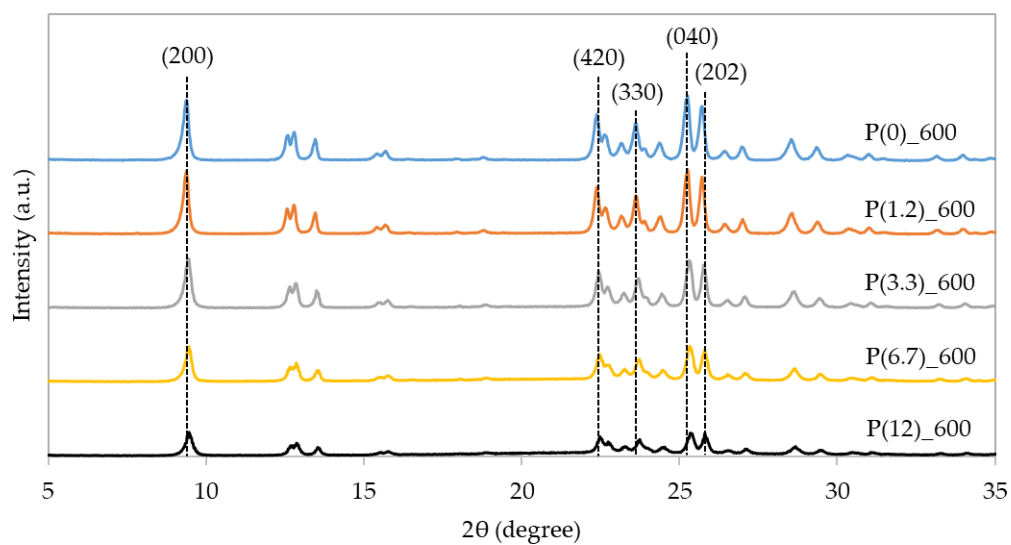

**Figure S3.** XRD patterns of P-modified ferrierite zeolites calcined at 600 °C.

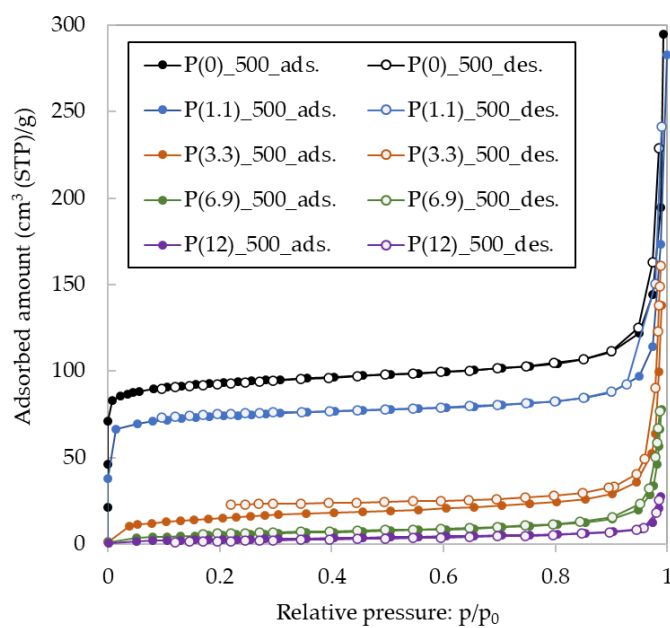

**Figure S4.**  $N_2$  adsorption-desorption isotherms for P-modified ferrierite zeolites calcined at 500 °C.

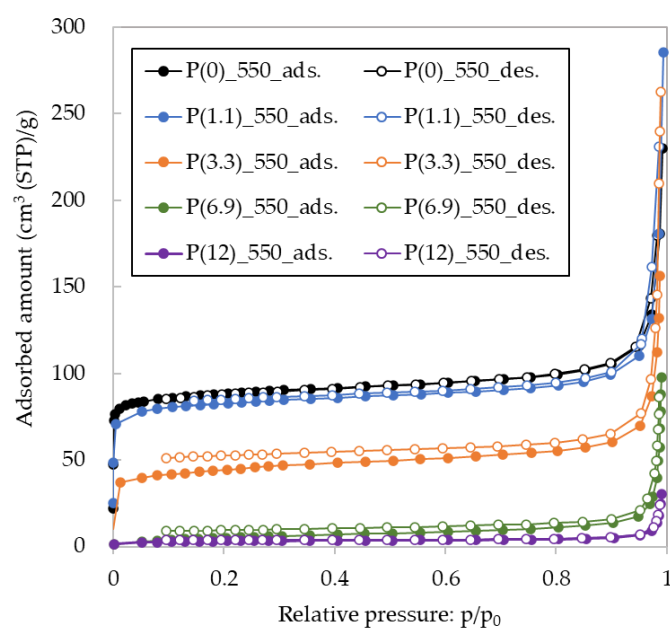

**Figure S5.** N<sub>2</sub> adsorption-desorption isotherms for P-modified ferrierite zeolites calcined at 550 °C.

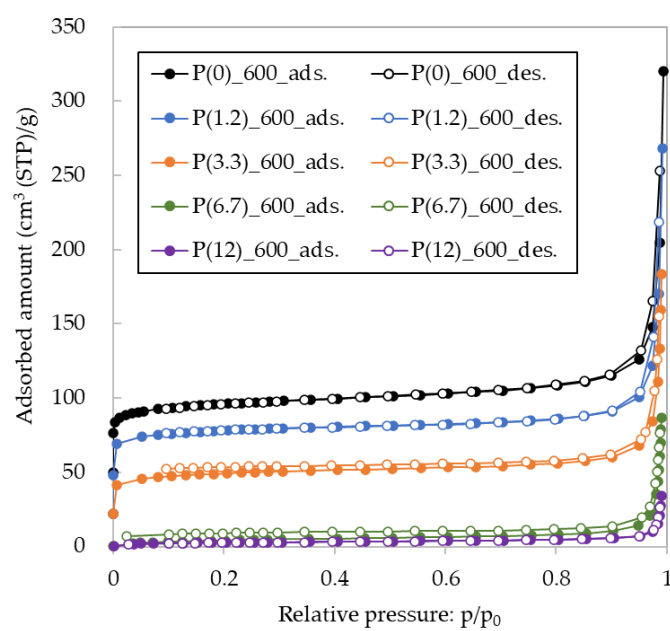

**Figure S6.** N<sub>2</sub> adsorption-desorption isotherms for P-modified ferrierite zeolites calcined at 600 °C.

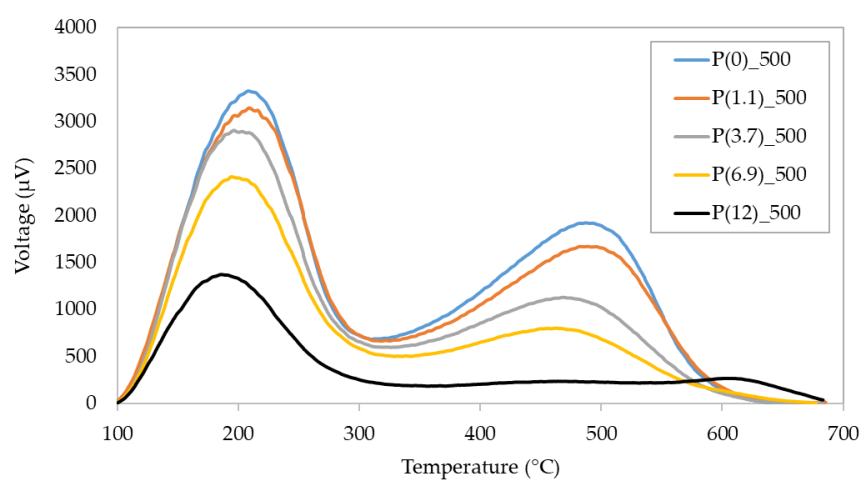

**Figure S7.** NH<sub>3</sub>-TPD profiles for P-modified ferrierite zeolites calcined at 500 °C.

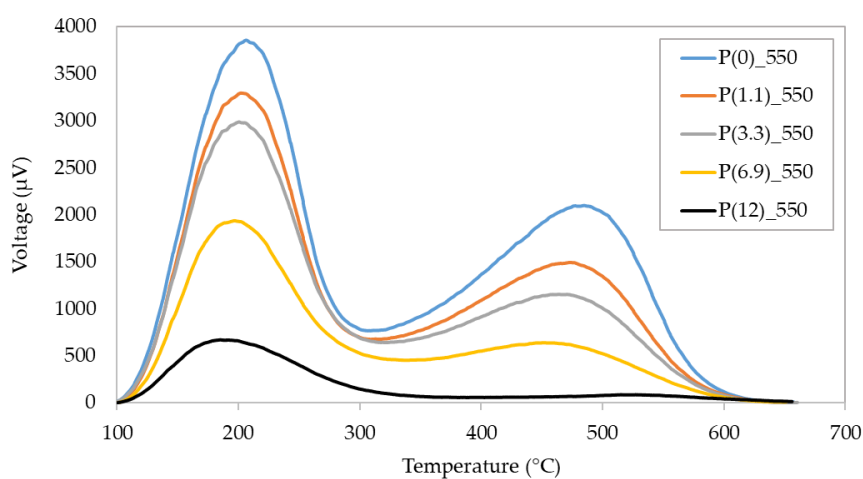

**Figure S8.** NH<sub>3</sub>-TPD profiles for P-modified ferrierite zeolites calcined at 550 °C.

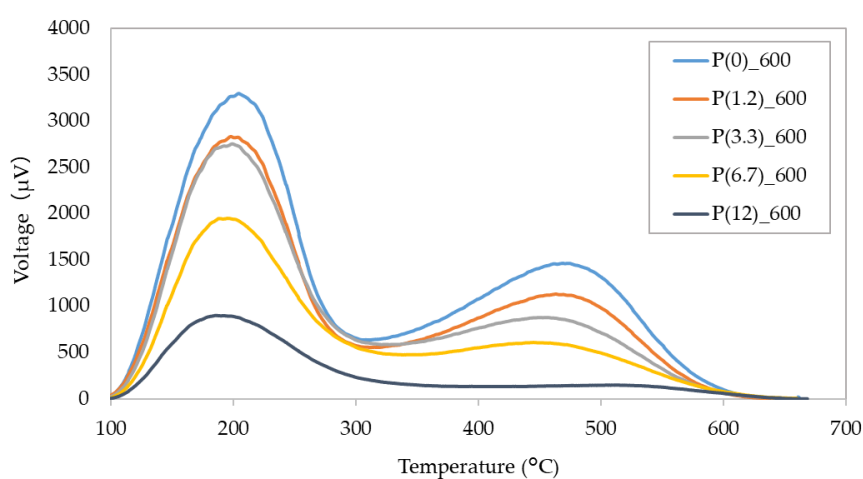

**Figure S9.** NH<sub>3</sub>-TPD profiles for P-modified ferrierite zeolites calcined at 600 °C.

**Table S1.** Supplementary table for multiple regression analysis.

| P-loaded zeolite   | Micropore surface area         | External surface area          | Total pore volume               | Micropore volume                | Weak acid            | Strong acid          | <i>n</i> -butene yield |
|--------------------|--------------------------------|--------------------------------|---------------------------------|---------------------------------|----------------------|----------------------|------------------------|
|                    | m <sup>2</sup> g <sup>-1</sup> | m <sup>2</sup> g <sup>-1</sup> | cm <sup>3</sup> g <sup>-1</sup> | cm <sup>3</sup> g <sup>-1</sup> | mmol g <sup>-1</sup> | mmol g <sup>-1</sup> | C-mol%                 |
|                    | X <sub>1</sub>                 | X <sub>2</sub>                 | X <sub>3</sub>                  | X <sub>4</sub>                  | X <sub>5</sub>       | X <sub>6</sub>       | y                      |
| P(0)_450           | 352                            | 28                             | 0.37                            | 0.11                            | 1.446                | 1.428                | 31.2                   |
| P(1.4)_450         | 339                            | 22                             | 0.27                            | 0.11                            | 1.388                | 1.303                | 4.6                    |
| P(3.3)_450         | 168                            | 21                             | 0.20                            | 0.06                            | 1.083                | 1.02                 | 0.2                    |
| P(6.9)_450         | 13                             | 12                             | 0.11                            | 0.01                            | 0.735                | 0.833                | 0.0                    |
| P(12)_450          | 5                              | 5                              | 0.04                            | 0.00                            | 0.536                | 0.6                  | 0.2                    |
| P(0)_500           | 460                            | 27                             | 0.37                            | 0.14                            | 1.397                | 1.305                | 27.8                   |
| P(1.1)_500         | 361                            | 21                             | 0.29                            | 0.11                            | 1.340                | 1.153                | 4.5                    |
| P(3.7)_500         | 34                             | 20                             | 0.23                            | 0.02                            | 1.121                | 0.831                | 0.3                    |
| P(6.9)_500         | 6                              | 14                             | 0.14                            | 0.00                            | 0.894                | 0.658                | 0.0                    |
| P(12)_500          | 4                              | 6                              | 0.05                            | 0.00                            | 0.504                | 0.379                | 0.0                    |
| P(0)_550           | 436                            | 27                             | 0.33                            | 0.13                            | 1.449                | 1.368                | 29.8                   |
| P(1.1)_550         | 392                            | 25                             | 0.37                            | 0.12                            | 1.235                | 1.059                | 2.5                    |
| P(3.3)_550         | 189                            | 24                             | 0.32                            | 0.06                            | 1.097                | 0.859                | 0.2                    |
| P(6.9)_550         | 8                              | 11                             | 0.15                            | 0.01                            | 0.633                | 0.538                | 0.0                    |
| P(12)_550          | 9                              | 3                              | 0.04                            | 0.00                            | 0.256                | 0.115                | 0.0                    |
| P(0)_600           | 474                            | 29                             | 0.38                            | 0.14                            | 1.324                | 1.027                | 19.8                   |
| P(1.2)_600         | 383                            | 19                             | 0.35                            | 0.11                            | 1.189                | 0.893                | 3.9                    |
| P(3.3)_600         | 229                            | 16                             | 0.28                            | 0.07                            | 1.009                | 0.733                | 0.3                    |
| P(6.7)_600         | 6                              | 9                              | 0.13                            | 0.03                            | 0.698                | 0.592                | 0.0                    |
| P(12)_600          | 5                              | 4                              | 0.05                            | 0.03                            | 0.328                | 0.201                | 0.3                    |
| Average            | 194                            | 17                             | 0.22                            | 0.06                            | 0.983                | 0.845                | 6.3                    |
| Standard deviation | 187                            | 9                              | 0.13                            | 0.05                            | 0.385                | 0.375                | 11.0                   |

Correlation coefficients (r<sub>ij</sub>)

| X <sub>i</sub> \ X <sub>j</sub> | X <sub>1</sub> | X <sub>2</sub> | X <sub>3</sub> | X <sub>4</sub> | X <sub>5</sub> | X <sub>6</sub> | y     |
|---------------------------------|----------------|----------------|----------------|----------------|----------------|----------------|-------|
|                                 |                |                |                |                |                |                |       |
| X <sub>1</sub>                  | 1.000          |                |                |                |                |                | 0.706 |
| X <sub>2</sub>                  | 0.860          | 1.000          |                |                |                |                | 0.666 |
| X <sub>3</sub>                  | 0.915          | 0.946          | 1.000          |                |                |                | 0.621 |
| X <sub>4</sub>                  | 0.988          | 0.847          | 0.909          | 1.000          |                |                | 0.700 |
| X <sub>5</sub>                  | 0.869          | 0.960          | 0.923          | 0.856          | 1.000          |                | 0.636 |
| X <sub>6</sub>                  | 0.818          | 0.906          | 0.828          | 0.805          | 0.956          | 1.000          | 0.690 |
| y                               | 0.706          | 0.666          | 0.621          | 0.700          | 0.636          | 1.000          | 1.000 |
